# Supplementary material for: Perinatal hormones favor CC17 group B Streptococcus intestinal translocation through M cells and hypervirulence in neonates
Source: eLife journal article supplement (doi:10.7554/elife.48772), 2019-11-11
Supplement: supp [file elife-48772-supp-v1.zip]

Archive with 5 entries (5 files):
- elife_poa_e48772_Figure_1_figure_supplement_2.tif
- elife_poa_e48772_Figure_3_figure_supplement_1.jpg
- elife_poa_e48772_Figure_1_figure_supplement_1.tif
- elife_poa_e48772_Supplementary_file_1.docx
- elife_poa_e48772_Transparent_Reporting_File.pdf
