# Supplementary figures and images for: Perinatal hormones favor CC17 group B Streptococcus intestinal translocation through M cells and hypervirulence in neonates
Source: eLife journal article supplement (doi:10.7554/elife.48772), 2019-11-11

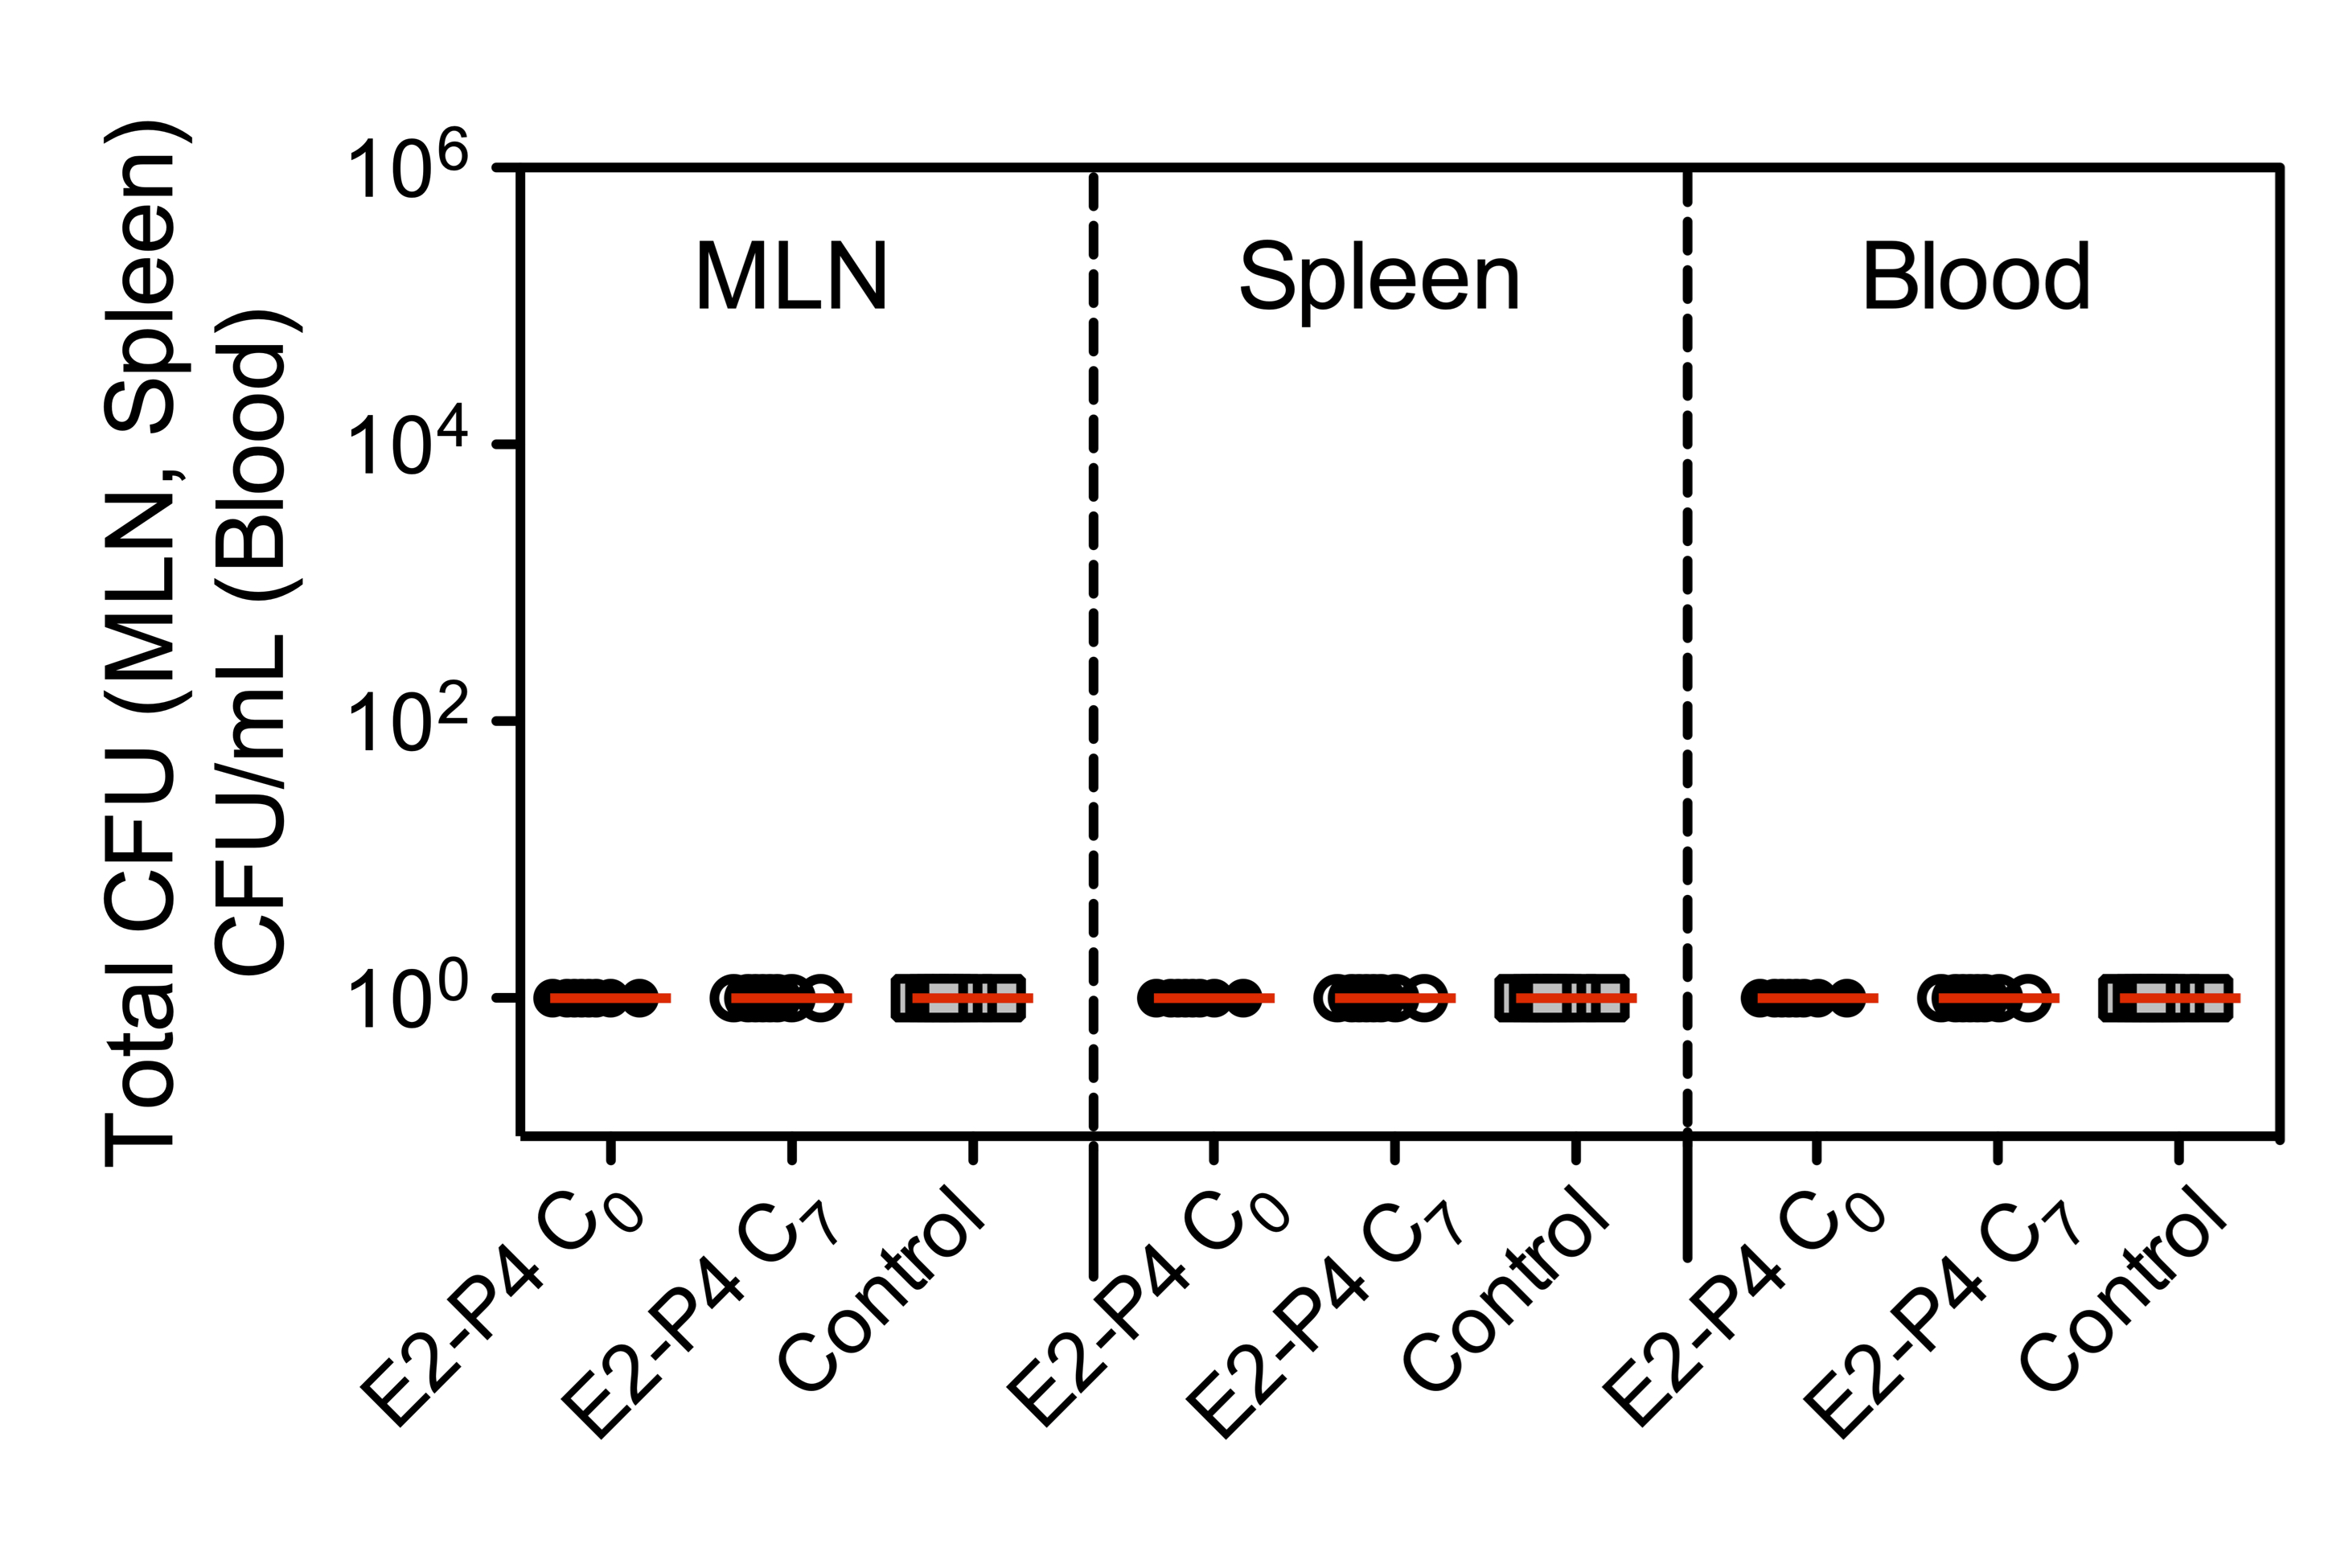

Supplement: supp [file elife-48772-supp-v1.zip › elife_poa_e48772_Figure_1_figure_supplement_2.tif]

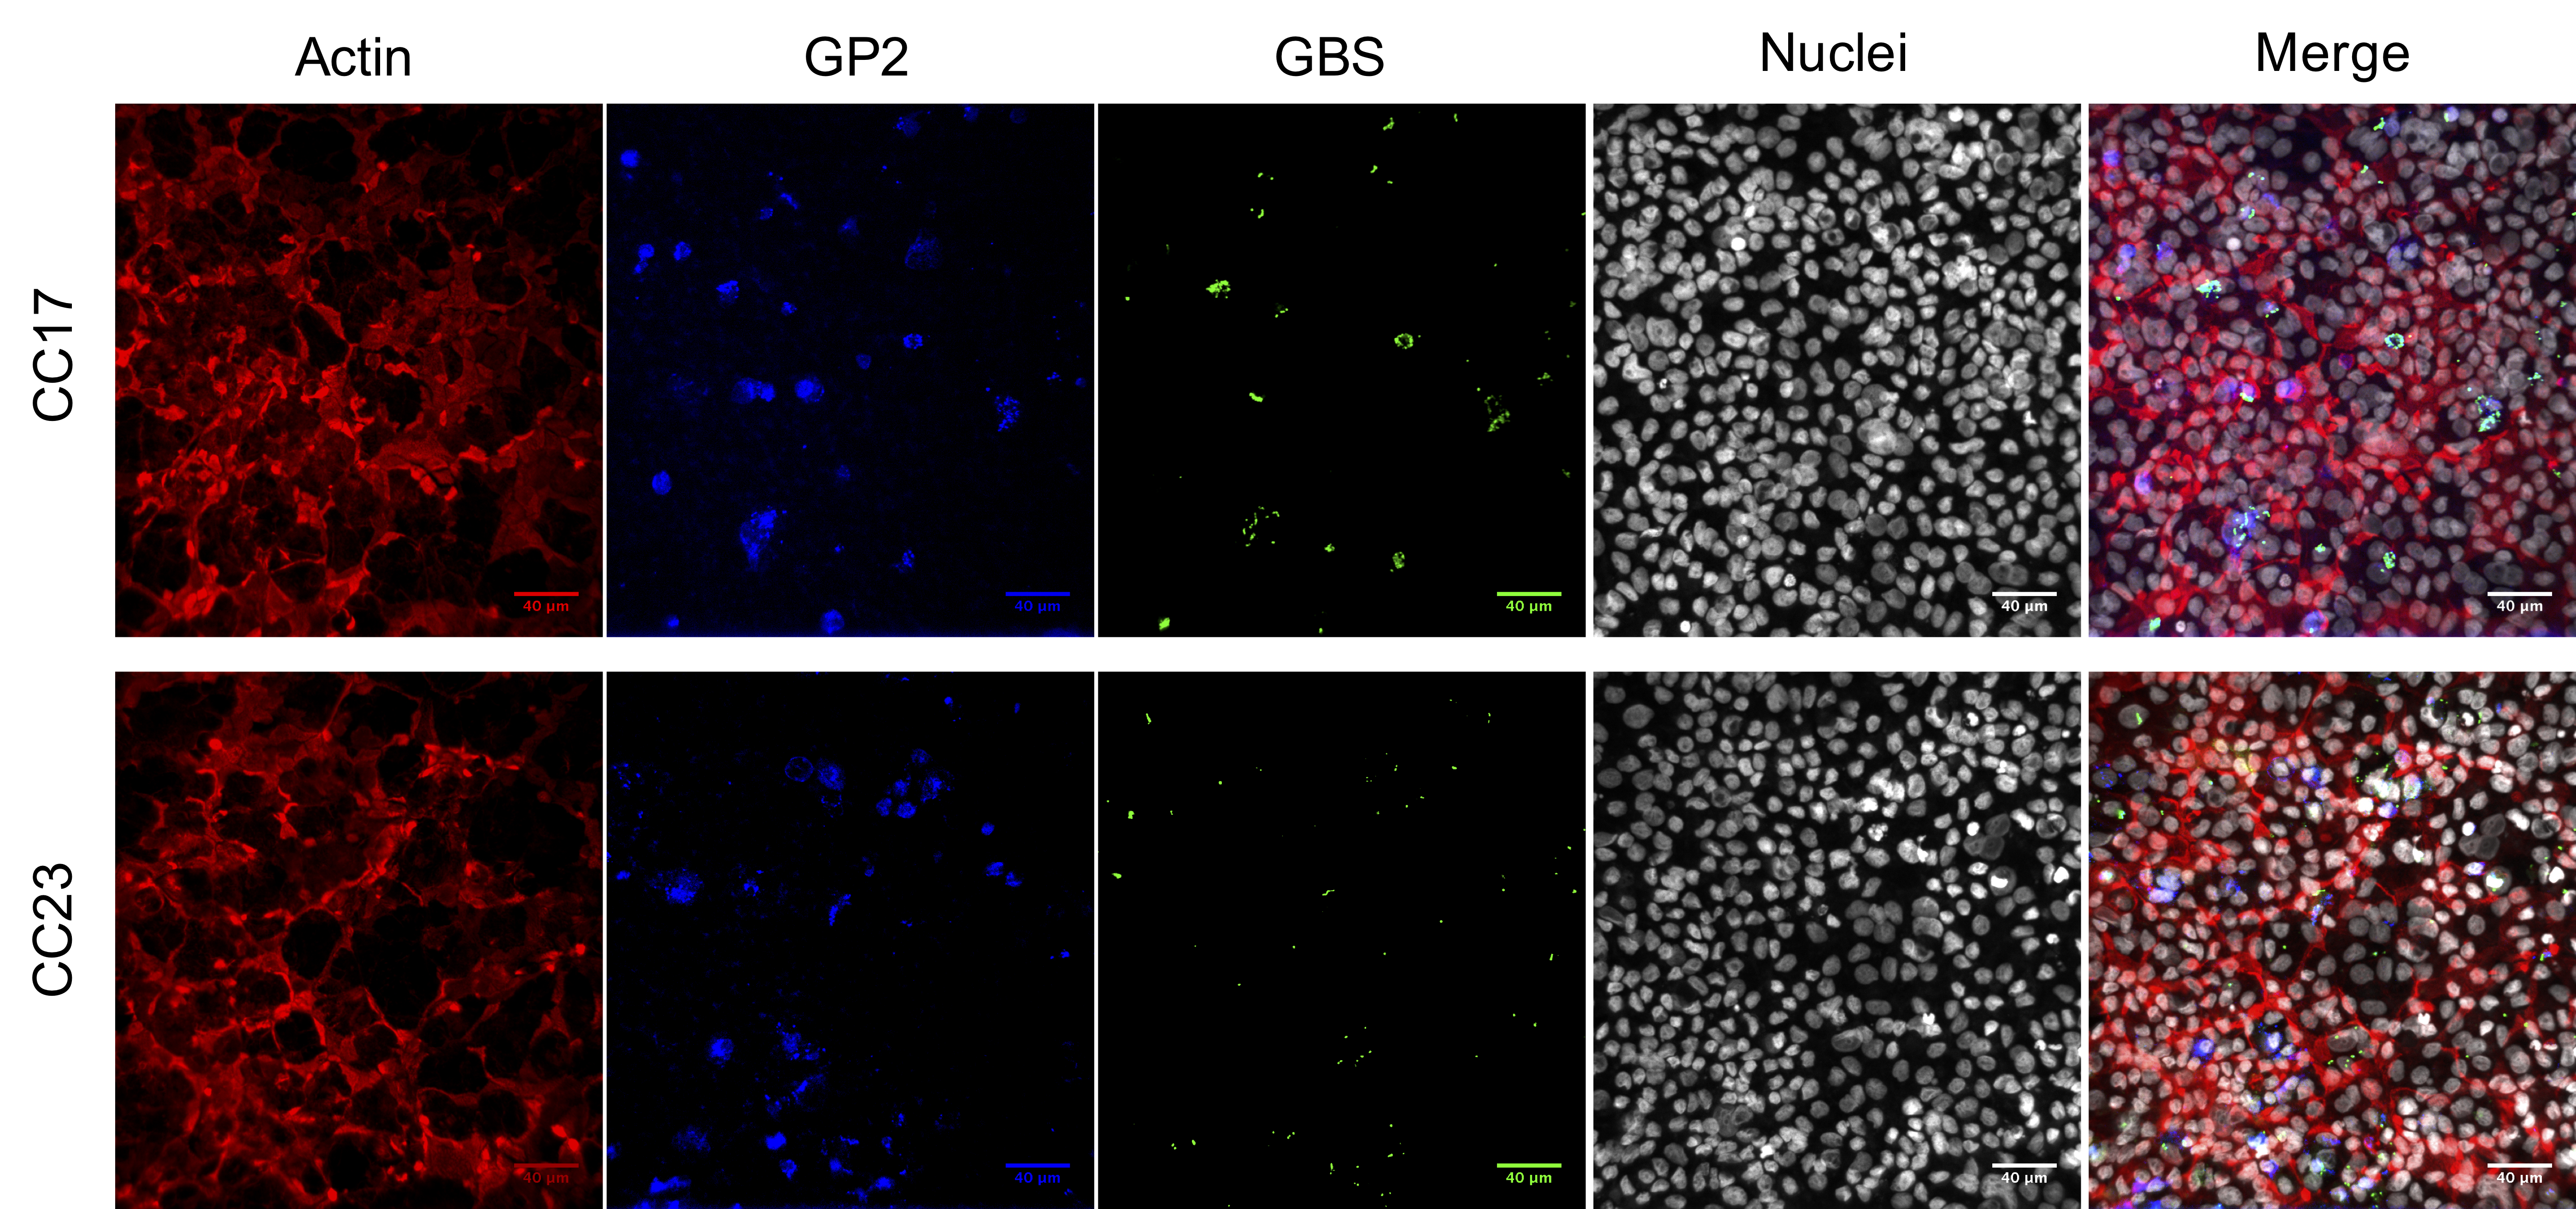

Supplement: supp [file elife-48772-supp-v1.zip › elife_poa_e48772_Figure_3_figure_supplement_1.jpg]

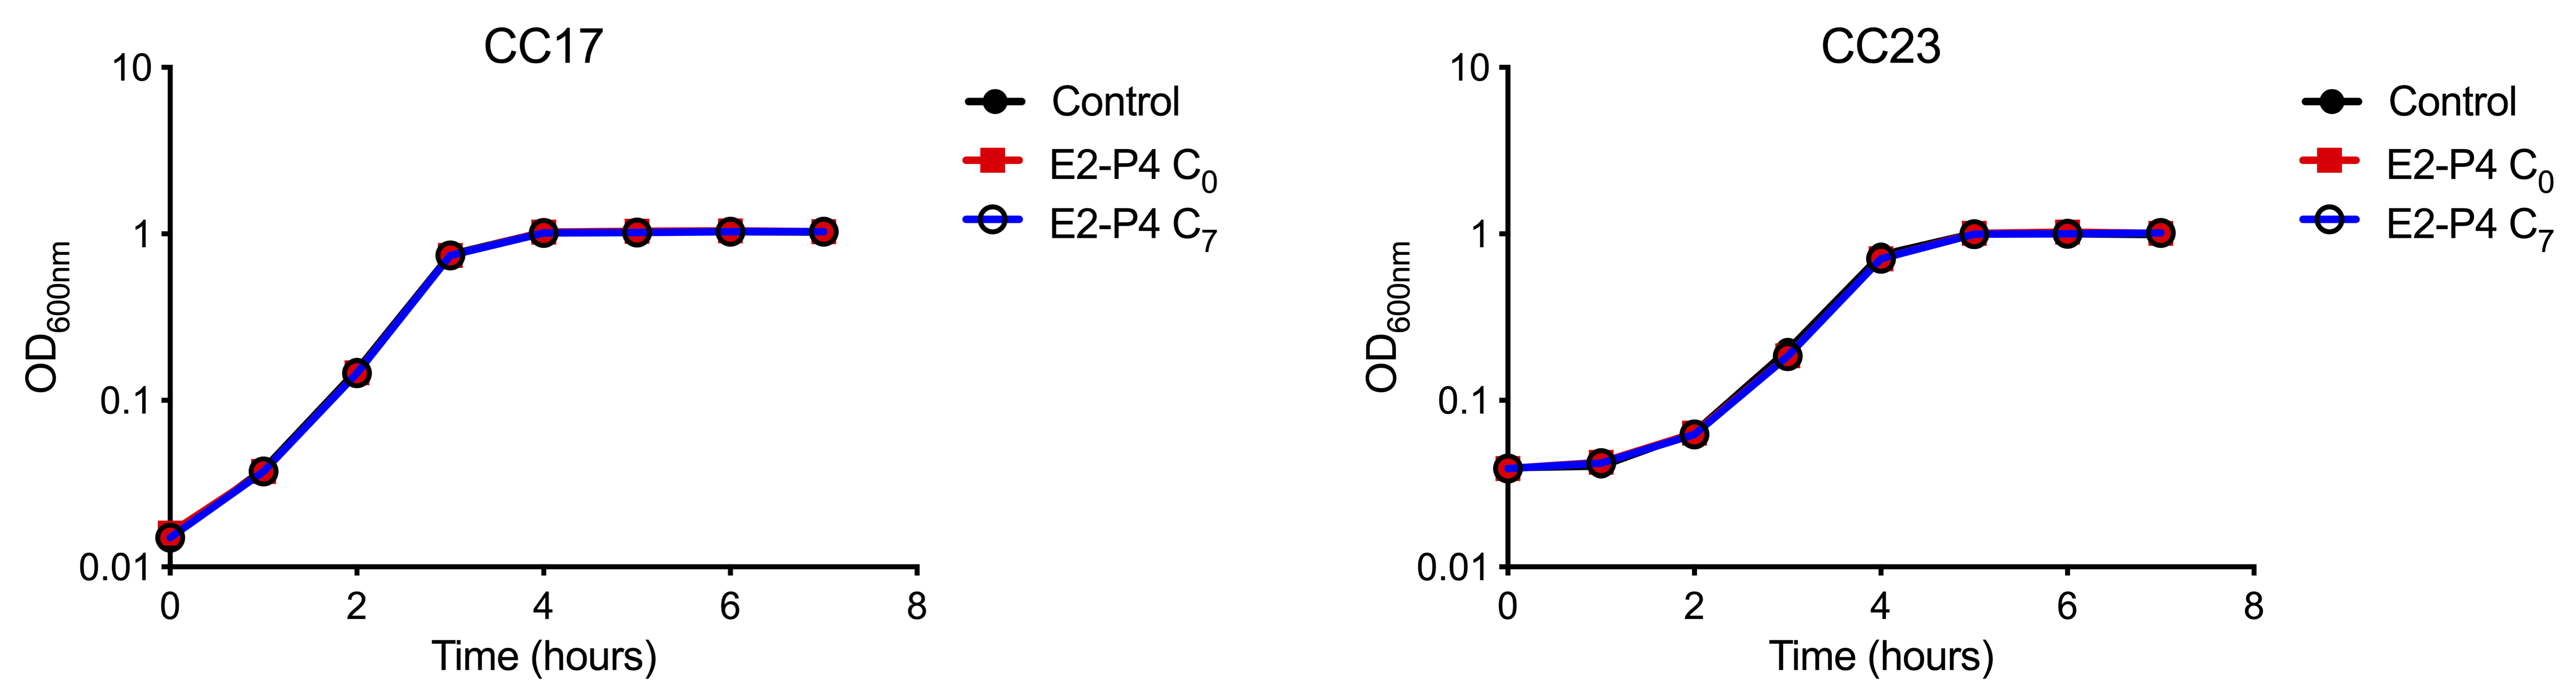

Supplement: supp [file elife-48772-supp-v1.zip › elife_poa_e48772_Figure_1_figure_supplement_1.tif]
